# Supplementary material for: Association between Exposure to Traffic-Related Air Pollution and Prevalence of Allergic Diseases in Children, Seoul, Korea
Source: PubMed Central journal article supplement (PMC5615949; doi:10.1155/2017/4216107), 2017-09-13
Supplement: 4216107.f1.pdf [file 4216107.f1.pdf]

**Table S1.** Distribution of distance from nearest roads and road density by regional and household SES in 14,765 children from the Seoul Atopy Friendly School Project Survey during 2010 in Seoul, Korea

|                     |                      | N (%)  |        | Distance (m) |          | Density (km <sup>2</sup> ) |        |
|---------------------|----------------------|--------|--------|--------------|----------|----------------------------|--------|
|                     |                      |        |        | Mean         | (SD)     | Mean                       | (SD)   |
| <b>Total</b>        |                      | 14,765 | (100)  | 320.75       | (261.60) | 7.16                       | (8.65) |
| <b>Regional SES</b> | <b>Household SES</b> |        |        |              |          |                            |        |
| High                |                      | 5,545  | (37.6) | 256.76       | (218.57) | 9.27                       | (8.37) |
| Middle              |                      | 6,539  | (44.3) | 273.56       | (220.76) | 8.23                       | (9.50) |
| Low                 |                      | 2,681  | (18.2) | 419.87       | (302.56) | 4.57                       | (6.73) |
|                     | High                 | 2,702  | (18.3) | 324.55       | (265.80) | 7.11                       | (8.58) |
|                     | Middle               | 6,991  | (47.3) | 319.69       | (261.75) | 7.25                       | (8.71) |
|                     | Low                  | 5,072  | (34.4) | 315.45       | (252.29) | 7.05                       | (8.65) |
| High                | High                 | 955    | (6.5)  | 249.69       | (218.02) | 9.76                       | (8.51) |
| High                | Middle               | 1,165  | (7.9)  | 258.55       | (223.33) | 9.21                       | (8.25) |
| High                | Low                  | 585    | (4.0)  | 264.68       | (209.74) | 8.58                       | (8.17) |
| Middle              | High                 | 2,588  | (17.5) | 270.68       | (216.46) | 8.21                       | (9.33) |
| Middle              | Middle               | 3,129  | (21.2) | 274.72       | (224.68) | 8.34                       | (9.61) |
| Middle              | Low                  | 1,274  | (8.6)  | 276.57       | (219.81) | 8.00                       | (9.60) |
| Low                 | High                 | 2,005  | (13.6) | 429.63       | (308.15) | 4.43                       | (6.68) |
| Low                 | Middle               | 2,245  | (15.2) | 414.10       | (299.30) | 4.71                       | (6.80) |
| Low                 | Low                  | 822    | (5.6)  | 411.85       | (296.77) | 4.49                       | (6.64) |

**Table S2.** Prevalence of allergic diseases by regional and household SES in 14,765 children from the Seoul Atopy Friendly School Project Survey during 2010 in Seoul, Korea

|                     |                      | Atopic eczema |               | Asthma |              | Allergic rhinitis |               |
|---------------------|----------------------|---------------|---------------|--------|--------------|-------------------|---------------|
|                     |                      | PR            | (95% CI)      | PR     | (95% CI)     | PR                | (95% CI)      |
| <b>Total</b>        |                      | 15.9          | (15.3 - 16.9) | 8.0    | (7.6 - 8.5)  | 36.2              | (35.4 - 36.9) |
| <b>Regional SES</b> | <b>Household SES</b> |               |               |        |              |                   |               |
| High                |                      | 17.4          | (15.9 - 18.8) | 9.3    | (8.2 - 10.3) | 33.4              | (31.6 - 35.2) |
| Middle              |                      | 16.0          | (15.1 - 16.8) | 9.0    | (8.3 - 9.7)  | 35.7              | (34.6 - 36.8) |
| Low                 |                      | 15.1          | (14.1 - 16.1) | 6.1    | (5.4 - 6.8)  | 38.3              | (37.0 - 39.6) |
|                     | High                 | 13.9          | (13.0 - 14.8) | 7.6    | (6.9 - 8.3)  | 38.2              | (37.0 - 39.5) |
|                     | Middle               | 16.8          | (15.9 - 17.7) | 8.1    | (7.5 - 8.8)  | 36.2              | (35.0 - 37.4) |
|                     | Low                  | 18.1          | (16.6 - 19.5) | 8.7    | (7.6 - 9.7)  | 31.7              | (30.0 - 33.5) |
| High                | High                 | 13.8          | (11.6 - 15.9) | 9.3    | (7.5 - 11.2) | 36.2              | (33.2 - 39.3) |
| High                | Middle               | 20.2          | (17.9 - 22.5) | 9.8    | (8.1 - 11.5) | 33.1              | (30.4 - 35.8) |
| High                | Low                  | 17.6          | (14.5 - 20.7) | 8.0    | (5.8 - 10.2) | 29.2              | (25.5 - 32.9) |
| Middle              | High                 | 14.2          | (12.8 - 15.5) | 8.5    | (7.4 - 9.5)  | 36.9              | (35.1 - 38.8) |
| Middle              | Middle               | 16.8          | (15.5 - 18.2) | 8.8    | (7.8 - 9.8)  | 36.1              | (34.5 - 37.8) |
| Middle              | Low                  | 17.4          | (15.3 - 19.5) | 10.5   | (8.8 - 12.2) | 31.9              | (29.4 - 34.5) |
| Low                 | High                 | 13.6          | (12.1 - 15.1) | 5.7    | (4.7 - 6.8)  | 40.8              | (38.7 - 43.0) |
| Low                 | Middle               | 14.9          | (13.4 - 16.4) | 6.4    | (5.4 - 7.4)  | 37.9              | (35.9 - 39.9) |
| Low                 | Low                  | 19.3          | (16.6 - 22.0) | 6.2    | (4.6 - 7.9)  | 33.2              | (30.0 - 36.4) |

**Table S3.** Association between two TRAP exposures and three allergic diseases on Model 3 by regional SES in 14,765 children from the Seoul Atopy Friendly School Project Survey during 2010 in Seoul, Korea

|                                                                          | High SES |                 | Middle SES |                 | Low SES     |                        |
|--------------------------------------------------------------------------|----------|-----------------|------------|-----------------|-------------|------------------------|
|                                                                          | OR       | 95% C.I.        | OR         | 95% C.I.        | OR          | 95% C.I.               |
| <b>Proximity</b>                                                         |          |                 |            |                 |             |                        |
| Atopic eczema                                                            |          |                 |            |                 |             |                        |
| ≤150m                                                                    | 1.30     | ( 0.93 - 1.82 ) | 0.98       | ( 0.79 - 1.22 ) | <b>1.27</b> | <b>( 1.02 - 1.57 )</b> |
| 150-300m                                                                 | 1.15     | ( 0.81 - 1.63 ) | 1.11       | ( 0.89 - 1.37 ) | 1.19        | ( 0.96 - 1.48 )        |
| 300-500m                                                                 | 1.33     | ( 0.92 - 1.92 ) | 1.06       | ( 0.85 - 1.33 ) | 1.19        | ( 0.97 - 1.47 )        |
| >500m                                                                    | 1.00     |                 | 1.00       |                 | 1.00        |                        |
| Asthma                                                                   |          |                 |            |                 |             |                        |
| ≤150m                                                                    | 1.01     | ( 0.67 - 1.53 ) | 0.84       | ( 0.64 - 1.09 ) | 0.93        | ( 0.67 - 1.28 )        |
| 150-300m                                                                 | 1.08     | ( 0.72 - 1.62 ) | 1.05       | ( 0.81 - 1.37 ) | 1.12        | ( 0.82 - 1.52 )        |
| 300-500m                                                                 | 1.28     | ( 0.85 - 1.95 ) | 0.94       | ( 0.72 - 1.24 ) | 0.82        | ( 0.60 - 1.13 )        |
| >500m                                                                    | 1.00     |                 | 1.00       |                 | 1.00        |                        |
| Allergic rhinitis                                                        |          |                 |            |                 |             |                        |
| ≤150m                                                                    | 0.89     | ( 0.68 - 1.18 ) | 1.00       | ( 0.84 - 1.19 ) | 1.04        | ( 0.89 - 1.22 )        |
| 150-300m                                                                 | 1.06     | ( 0.80 - 1.40 ) | 1.07       | ( 0.90 - 1.27 ) | 1.07        | ( 0.91 - 1.25 )        |
| 300-500m                                                                 | 1.07     | ( 0.79 - 1.45 ) | 1.06       | ( 0.89 - 1.27 ) | 0.96        | ( 0.82 - 1.12 )        |
| >500m                                                                    | 1.00     |                 | 1.00       |                 | 1.00        |                        |
| <b>Density for an interquartile range increase (13,120m<sup>2</sup>)</b> |          |                 |            |                 |             |                        |
| Atopic eczema                                                            | 1.05     | ( 0.89 - 1.25 ) | 1.02       | ( 0.94 - 1.12 ) | <b>1.18</b> | <b>( 1.02 - 1.37 )</b> |
| Asthma                                                                   | 0.98     | ( 0.78 - 1.24 ) | 0.90       | ( 0.80 - 1.01 ) | 1.03        | ( 0.82 - 1.28 )        |
| Allergic rhinitis                                                        | 0.90     | ( 0.78 - 1.03 ) | 0.96       | ( 0.90 - 1.03 ) | 1.06        | ( 0.95 - 1.19 )        |

**Table S4.** Association between two TRAP exposures and three allergic diseases on Model 3 by household SES in 14,765 children from the Seoul Atopy Friendly School Project Survey during 2010 in Seoul, Korea

|                                                                          | High SES    |                        | Middle SES |                 | Low SES     |                        |
|--------------------------------------------------------------------------|-------------|------------------------|------------|-----------------|-------------|------------------------|
|                                                                          | OR          | 95% C.I.               | OR         | 95% C.I.        | OR          | 95% C.I.               |
| <b>Proximity</b>                                                         |             |                        |            |                 |             |                        |
| Atopic eczema                                                            |             |                        |            |                 |             |                        |
| ≤150m                                                                    | <b>1.32</b> | ( <b>1.05 - 1.67</b> ) | 0.98       | ( 0.81 - 1.19 ) | 1.21        | ( 0.89 - 1.65 )        |
| 150-300m                                                                 | 1.19        | ( 0.94 - 1.52 )        | 1.12       | ( 0.92 - 1.37 ) | 1.17        | ( 0.86 - 1.59 )        |
| 300-500m                                                                 | 1.11        | ( 0.87 - 1.42 )        | 1.10       | ( 0.90 - 1.35 ) | 1.38        | ( 1.02 - 1.88 )        |
| >500m                                                                    | 1.00        |                        | 1.00       |                 | 1.00        |                        |
| Asthma                                                                   |             |                        |            |                 |             |                        |
| ≤150m                                                                    | 0.92        | ( 0.68 - 1.25 )        | 0.90       | ( 0.69 - 1.18 ) | 0.78        | ( 0.52 - 1.17 )        |
| 150-300m                                                                 | 1.15        | ( 0.85 - 1.55 )        | 1.09       | ( 0.84 - 1.41 ) | 0.92        | ( 0.62 - 1.36 )        |
| 300-500m                                                                 | 1.06        | ( 0.78 - 1.44 )        | 1.04       | ( 0.79 - 1.36 ) | 0.70        | ( 0.46 - 1.07 )        |
| >500m                                                                    | 1.00        |                        | 1.00       |                 | 1.00        |                        |
| Allergic rhinitis                                                        |             |                        |            |                 |             |                        |
| ≤150m                                                                    | 1.06        | ( 0.90 - 1.26 )        | 0.89       | ( 0.76 - 1.03 ) | 1.13        | ( 0.88 - 1.45 )        |
| 150-300m                                                                 | 1.17        | ( 0.98 - 1.38 )        | 0.96       | ( 0.82 - 1.12 ) | 1.15        | ( 0.90 - 1.48 )        |
| 300-500m                                                                 | 1.11        | ( 0.93 - 1.31 )        | 0.96       | ( 0.82 - 1.12 ) | 0.98        | ( 0.76 - 1.27 )        |
| >500m                                                                    | 1.00        |                        | 1.00       |                 | 1.00        |                        |
| <b>Density for an interquartile range increase (13,120m<sup>2</sup>)</b> |             |                        |            |                 |             |                        |
| Atopic eczema                                                            | <b>1.14</b> | ( <b>1.01 - 1.28</b> ) | 0.99       | ( 0.90 - 1.10 ) | 1.13        | ( 0.97 - 1.32 )        |
| Asthma                                                                   | 0.90        | ( 0.77 - 1.07 )        | 0.94       | ( 0.82 - 1.08 ) | 0.92        | ( 0.75 - 1.14 )        |
| Allergic rhinitis                                                        | 0.95        | ( 0.87 - 1.04 )        | 0.94       | ( 0.87 - 1.02 ) | <b>1.15</b> | ( <b>1.02 - 1.31</b> ) |

**Table S5.** Association between two TRAP exposures and three allergic diseases on Model 3 by joint combinations of regional and household SES in 14,765 children from the Seoul Atopy Friendly School Project Survey during 2010 in Seoul, Korea

|                                                                           |               | Atopic eczema |                        | Asthma |                 | Allergic rhinitis |                        |
|---------------------------------------------------------------------------|---------------|---------------|------------------------|--------|-----------------|-------------------|------------------------|
|                                                                           |               | OR            | (95% CI)               | OR     | (95% CI)        | OR                | (95% CI)               |
| <b>Proximity (<math>\leq 300\text{m}</math>)</b>                          |               |               |                        |        |                 |                   |                        |
| Regional SES                                                              | Household SES |               |                        |        |                 |                   |                        |
| High                                                                      | High          | 0.94          | ( 0.60 - 1.47 )        | 0.80   | ( 0.48 - 1.33 ) | 0.78              | ( 0.56 - 1.03 )        |
| High                                                                      | Middle        | 1.14          | ( 0.81 - 1.60 )        | 0.90   | ( 0.58 - 1.39 ) | 0.92              | ( 0.69 - 1.23 )        |
| High                                                                      | Low           | 0.95          | ( 0.58 - 1.57 )        | 1.06   | ( 0.54 - 2.07 ) | 1.27              | ( 0.83 - 1.94 )        |
| Middle                                                                    | High          | 1.18          | ( 0.93 - 1.51 )        | 1.00   | ( 0.74 - 1.35 ) | 1.06              | ( 0.89 - 1.27 )        |
| Middle                                                                    | Middle        | 0.90          | ( 0.74 - 1.10 )        | 0.95   | ( 0.73 - 1.23 ) | 0.92              | ( 0.79 - 1.07 )        |
| Middle                                                                    | Low           | 0.97          | ( 0.71 - 1.32 )        | 1.01   | ( 0.69 - 1.48 ) | 1.00              | ( 0.78 - 1.29 )        |
| Low                                                                       | High          | 1.27          | ( 0.98 - 1.65 )        | 1.11   | ( 0.75 - 1.63 ) | 1.11              | ( 0.92 - 1.33 )        |
| Low                                                                       | Middle        | 1.10          | ( 0.87 - 1.39 )        | 1.11   | ( 0.79 - 1.57 ) | 0.98              | ( 0.82 - 1.17 )        |
| Low                                                                       | Low           | 1.03          | ( 0.72 - 1.46 )        | 1.16   | ( 0.65 - 2.08 ) | 1.28              | ( 0.95 - 1.72 )        |
| <b>Density for an interquartile range increment (13,120m<sup>2</sup>)</b> |               |               |                        |        |                 |                   |                        |
| Regional SES                                                              | Household SES |               |                        |        |                 |                   |                        |
| High                                                                      | High          | 0.99          | ( 0.72 - 1.36 )        | 0.91   | ( 0.61 - 1.36 ) | 0.81              | ( 0.64 - 1.02 )        |
| High                                                                      | Middle        | 1.10          | ( 0.87 - 1.40 )        | 0.99   | ( 0.70 - 1.41 ) | 0.87              | ( 0.71 - 1.07 )        |
| High                                                                      | Low           | 1.01          | ( 0.69 - 1.47 )        | 0.99   | ( 0.57 - 1.71 ) | 1.17              | ( 0.86 - 1.60 )        |
| Middle                                                                    | High          | 1.10          | ( 0.94 - 1.28 )        | 0.86   | ( 0.70 - 1.06 ) | 0.94              | ( 0.83 - 1.06 )        |
| Middle                                                                    | Middle        | 0.92          | ( 0.81 - 1.05 )        | 0.92   | ( 0.78 - 1.10 ) | 0.95              | ( 0.86 - 1.06 )        |
| Middle                                                                    | Low           | 1.18          | ( 0.97 - 1.44 )        | 0.90   | ( 0.70 - 1.17 ) | 1.03              | ( 0.88 - 1.22 )        |
| Low                                                                       | High          | <b>1.31</b>   | <b>( 1.04 - 1.66 )</b> | 1.06   | ( 0.73 - 1.53 ) | 1.05              | ( 0.88 - 1.26 )        |
| Low                                                                       | Middle        | 1.14          | ( 0.92 - 1.38 )        | 1.00   | ( 0.72 - 1.38 ) | 0.96              | ( 0.81 - 1.14 )        |
| Low                                                                       | Low           | 1.08          | ( 0.77 - 1.52 )        | 1.09   | ( 0.63 - 1.86 ) | <b>1.49</b>       | <b>( 1.12 - 1.98 )</b> |

**Table S6.** Association between the distance from the closest major roads and three allergic diseases in 14,765 children from the Seoul Atopy Friendly School Project Survey during 2010 in Seoul, Korea

|                                                                 | Model 1         |                        | Model 2         |                        | Model 3         |                        |
|-----------------------------------------------------------------|-----------------|------------------------|-----------------|------------------------|-----------------|------------------------|
|                                                                 | OR <sup>a</sup> | 95% C.I.               | OR <sup>b</sup> | 95% C.I.               | OR <sup>c</sup> | 95% C.I.               |
| <b>Distance to nearest major roads for 300 meters increment</b> |                 |                        |                 |                        |                 |                        |
| Atopic eczema                                                   | <b>0.93</b>     | <b>( 0.88 - 0.98 )</b> | <b>0.95</b>     | <b>( 0.90 - 1.00 )</b> | <b>0.93</b>     | <b>( 0.89 - 0.99 )</b> |
| Asthma                                                          | 1.00            | ( 0.93 - 1.07 )        | 1.03            | ( 0.96 - 1.11 )        | 1.01            | ( 0.94 - 1.09 )        |
| Allergic rhinitis                                               | 1.01            | ( 0.97 - 1.05 )        | 1.00            | ( 0.96 - 1.04 )        | 1.01            | ( 0.96 - 1.05 )        |

a. Odds ratio (OR) adjusted for sex and age; b. OR adjusted for sex, age, household monthly income, body mass index and history of breastfeeding; c. OR adjusted for sex, age, household monthly income, body mass index and history of breastfeeding, random effects for school and residential area

**Table S7.** Association between two TRAP exposures and three allergic diseases on Model 3 by residential floor levels in 24,040 children including 5,211 children living on the 4th to 9<sup>th</sup> floor and 4,064 children on the 10<sup>th</sup> floor or over from the Seoul Atopy Friendly School Project Survey during 2010 in Seoul, Korea

|                                                                           | All floors<br>(N=24,040) |                        | 4-9 <sup>th</sup> floors<br>(N=5,211) |                 | ≥10 floors<br>(N=4,064) |                        |
|---------------------------------------------------------------------------|--------------------------|------------------------|---------------------------------------|-----------------|-------------------------|------------------------|
|                                                                           | OR                       | 95% C.I.               | OR                                    | 95% C.I.        | OR                      | 95% C.I.               |
| <b>Proximity</b>                                                          |                          |                        |                                       |                 |                         |                        |
| Atopic eczema                                                             |                          |                        |                                       |                 |                         |                        |
| ≤150m                                                                     | 1.04                     | ( 0.94 - 1.15 )        | 0.81                                  | ( 0.63 - 1.03 ) | 0.86                    | ( 0.65 - 1.14 )        |
| 150-300m                                                                  | 1.11                     | ( 0.99 - 1.23 )        | 0.85                                  | ( 0.66 - 1.10 ) | 1.08                    | ( 0.80 - 1.45 )        |
| 300-500m                                                                  | 1.10                     | ( 0.98 - 1.23 )        | 0.86                                  | ( 0.65 - 1.13 ) | 1.07                    | ( 0.78 - 1.48 )        |
| >500m                                                                     | 1.00                     |                        | 1.00                                  |                 | 1.00                    |                        |
| Asthma                                                                    |                          |                        |                                       |                 |                         |                        |
| ≤150m                                                                     | 1.01                     | ( 0.87 - 1.16 )        | 1.15                                  | ( 0.81 - 1.62 ) | 1.48                    | ( 0.95 - 2.31 )        |
| 150-300m                                                                  | <b>1.17</b>              | <b>( 1.01 - 1.35 )</b> | 1.19                                  | ( 0.83 - 1.69 ) | <b>1.86</b>             | <b>( 1.18 - 2.94 )</b> |
| 300-500m                                                                  | 1.12                     | ( 0.96 - 1.31 )        | 1.36                                  | ( 0.94 - 1.97 ) | <b>1.87</b>             | <b>( 1.15 - 3.04 )</b> |
| >500m                                                                     | 1.00                     |                        | 1.00                                  |                 | 1.00                    |                        |
| Allergic rhinitis                                                         |                          |                        |                                       |                 |                         |                        |
| ≤150m                                                                     | 1.01                     | ( 0.93 - 1.10 )        | 1.00                                  | ( 0.82 - 1.21 ) | 1.22                    | ( 0.97 - 1.53 )        |
| 150-300m                                                                  | 1.07                     | ( 0.98 - 1.16 )        | 0.98                                  | ( 0.80 - 1.19 ) | <b>1.34</b>             | <b>( 1.05 - 1.70 )</b> |
| 300-500m                                                                  | 1.05                     | ( 0.96 - 1.15 )        | 1.11                                  | ( 0.90 - 1.37 ) | 1.18                    | ( 0.91 - 1.54 )        |
| >500m                                                                     | 1.00                     |                        | 1.00                                  |                 | 1.00                    |                        |
| <b>Density for an interquartile range increment (13,120m<sup>2</sup>)</b> |                          |                        |                                       |                 |                         |                        |
| Atopic eczema                                                             | 1.03                     | ( 0.97 - 1.08 )        | 0.93                                  | ( 0.83 - 1.05 ) | 0.94                    | ( 0.83 - 1.07 )        |
| Asthma                                                                    | 0.96                     | ( 0.89 - 1.03 )        | 0.97                                  | ( 0.83 - 1.13 ) | 1.01                    | ( 0.85 - 1.20 )        |
| Allergic rhinitis                                                         | 0.99                     | ( 0.95 - 1.03 )        | 0.96                                  | ( 0.88 - 1.05 ) | 1.04                    | ( 0.95 - 1.15 )        |

**Table S8.** Association between two TRAP exposures and three allergic diseases on Model 3 in 18,159 children including 14,765 in our primary analysis and 3,394 who did not respond to questionnaire for individual characteristics from the Seoul Atopy Friendly School Project Survey during 2010 in Seoul, Korea

|                                                                           | Atopic eczema |                        | Asthma |                 | Allergic rhinitis |                 |
|---------------------------------------------------------------------------|---------------|------------------------|--------|-----------------|-------------------|-----------------|
|                                                                           | OR            | 95% C.I.               | OR     | 95% C.I.        | OR                | 95% C.I.        |
| <b>Proximity</b>                                                          |               |                        |        |                 |                   |                 |
| ≤150m                                                                     | <b>1.21</b>   | <b>( 1.07 - 1.36 )</b> | 1.01   | ( 0.86 - 1.18 ) | 0.97              | ( 0.89 - 1.06 ) |
| 150-300m                                                                  | <b>1.22</b>   | <b>( 1.08 - 1.38 )</b> | 1.11   | ( 0.95 - 1.30 ) | 1.05              | ( 0.96 - 1.15 ) |
| 300-500m                                                                  | <b>1.18</b>   | <b>( 1.04 - 1.34 )</b> | 1.05   | ( 0.89 - 1.24 ) | 1.02              | ( 0.92 - 1.12 ) |
| >500m                                                                     | 1.00          |                        | 1.00   |                 | 1.00              |                 |
| <b>Density for an interquartile range increment (13,120m<sup>2</sup>)</b> |               |                        |        |                 |                   |                 |
|                                                                           | <b>1.09</b>   | <b>( 1.02 - 1.15 )</b> | 0.97   | ( 0.89 - 1.05 ) | 0.98              | ( 0.93 - 1.02 ) |

**Table S9.** Association between two TRAP exposures and three allergic diseases on Model 3 and disease prevalence rates (PRs) in 11,803 children aged 6-12 years from the Seoul Atopy Friendly School Project Survey during 2010 in Seoul, Korea

| Odds ratios (ORs)                                                         | Atopic eczema |                 | Asthma    |                 | Allergic rhinitis |                 |
|---------------------------------------------------------------------------|---------------|-----------------|-----------|-----------------|-------------------|-----------------|
|                                                                           | OR            | 95% C.I.        | OR        | 95% C.I.        | OR                | 95% C.I.        |
| <b>Proximity</b>                                                          |               |                 |           |                 |                   |                 |
| ≤150m                                                                     | <b>1.28</b>   | ( 1.09 - 1.49 ) | 0.98      | ( 0.78 - 1.23 ) | 0.98              | ( 0.87 - 1.10 ) |
| 150-300m                                                                  | <b>1.34</b>   | ( 1.14 - 1.57 ) | 1.16      | ( 0.92 - 1.46 ) | 1.06              | ( 0.94 - 1.19 ) |
| 300-500m                                                                  | <b>1.24</b>   | ( 1.05 - 1.46 ) | 1.06      | ( 0.84 - 1.35 ) | 1.03              | ( 0.91 - 1.16 ) |
| >500m                                                                     | 1.00          |                 | 1.00      |                 | 1.00              |                 |
| <b>Density for an interquartile range increment (13,120m<sup>2</sup>)</b> |               |                 |           |                 |                   |                 |
|                                                                           | <b>1.12</b>   | ( 1.03 - 1.21 ) | 0.94      | ( 0.83 - 1.06 ) | 0.97              | ( 0.91 - 1.03 ) |
| <b>Prevalence rates (PRs)</b>                                             |               |                 |           |                 |                   |                 |
|                                                                           | <b>PR</b>     | <b>95% C.I.</b> | <b>PR</b> | <b>95% C.I.</b> | <b>PR</b>         | <b>95% C.I.</b> |
| All ages (N=14,765)                                                       | 15.9          | ( 15.3 - 16.9 ) | 8.0       | ( 7.6 - 8.5 )   | 36.2              | ( 35.4 - 36.9 ) |
| Aged 6-12 years (N=11,803)                                                | 15.4          | ( 14.7 - 16.0 ) | 6.4       | ( 6.0 - 6.9 )   | 37.3              | ( 36.4 - 38.1 ) |

**Table S10.** Association between two TRAP exposures and lifetime physician-diagnosed allergic diseases on Model 3 in 14,765 children from the Seoul Atopy Friendly School Project Survey during 2010 in Seoul, Korea

| Odds ratios (ORs)                                                         | Atopic eczema |                 | Asthma    |                 | Allergic rhinitis |                 |
|---------------------------------------------------------------------------|---------------|-----------------|-----------|-----------------|-------------------|-----------------|
|                                                                           | OR            | 95% C.I.        | OR        | 95% C.I.        | OR                | 95% C.I.        |
| <b>Proximity</b>                                                          |               |                 |           |                 |                   |                 |
| ≤150m                                                                     | <b>1.11</b>   | ( 1.01 - 1.23 ) | 0.98      | ( 0.82 - 1.18 ) | 1.02              | ( 0.91 - 1.14 ) |
| 150-300m                                                                  | <b>1.11</b>   | ( 1.00 - 1.23 ) | 0.96      | ( 0.80 - 1.16 ) | 1.01              | ( 0.91 - 1.13 ) |
| 300-500m                                                                  | 1.04          | ( 0.94 - 1.16 ) | 1.02      | ( 0.84 - 1.23 ) | 1.06              | ( 0.95 - 1.19 ) |
| >500m                                                                     | 1.00          |                 | 1.00      |                 | 1.00              |                 |
| <b>Density for an interquartile range increment (13,120m<sup>2</sup>)</b> |               |                 |           |                 |                   |                 |
|                                                                           | <b>1.10</b>   | ( 1.04 - 1.15 ) | 0.88      | ( 0.80 - 0.97 ) | 0.99              | ( 0.93 - 1.04 ) |
| <b>Prevalence rates (PRs)</b>                                             |               |                 |           |                 |                   |                 |
|                                                                           | <b>PR</b>     | <b>95% C.I.</b> | <b>PR</b> | <b>95% C.I.</b> | <b>PR</b>         | <b>95% C.I.</b> |
| All ages (N=14,765)                                                       | 15.9          | ( 15.3 - 16.9 ) | 8.0       | ( 7.6 - 8.5 )   | 36.2              | ( 35.4 - 36.9 ) |

**Table S11.** Association between two TRAP exposures, estimated based on schools in addition to residences, and three allergic diseases on Model 3 in 14,765 children from the Seoul Atopy Friendly School Project Survey during 2010 in Seoul, Korea

|                                                                          | Atopic eczema |                        | Asthma |                 | Allergic rhinitis |                 |
|--------------------------------------------------------------------------|---------------|------------------------|--------|-----------------|-------------------|-----------------|
|                                                                          | OR            | 95% C.I.               | OR     | 95% C.I.        | OR                | 95% C.I.        |
| <b>Proximity</b>                                                         |               |                        |        |                 |                   |                 |
| ≤150m                                                                    | <b>1.20</b>   | ( <b>1.02 - 1.43</b> ) | 0.98   | ( 0.79 - 1.21 ) | 0.92              | ( 0.80 - 1.05 ) |
| 150-300m                                                                 | <b>1.18</b>   | ( <b>1.00 - 1.41</b> ) | 0.97   | ( 0.78 - 1.21 ) | 0.98              | ( 0.86 - 1.11 ) |
| 300-500m                                                                 | 1.17          | ( 0.98 - 1.40 )        | 0.97   | ( 0.77 - 1.22 ) | 0.99              | ( 0.87 - 1.13 ) |
| >500m                                                                    | 1.00          |                        | 1.00   |                 | 1.00              |                 |
| <b>Density for an interquartile range increment (9,164m<sup>2</sup>)</b> |               |                        |        |                 |                   |                 |
|                                                                          | 1.05          | ( 0.99 - 1.13 )        | 0.94   | ( 0.86 - 1.03 ) | 0.96              | ( 0.91 - 1.02 ) |
